# Supplementary material for: Plasmon Effect of Ag Nanoparticles on TiO2/rGO Nanostructures for Enhanced Energy Harvesting and Environmental Remediation
Source: MDPI journal article supplement (doi:10.3390/nano13010065), 2022-12-23
Supplement: s1 [file s1]

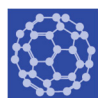

## Supplementary Materials

# Plasmon Effect of Ag Nanoparticles on TiO<sub>2</sub>/rGO Nanostructures for Enhanced Energy Harvesting and Environmental Remediation

Seenidurai Athithya <sup>1</sup>, Valparai Surangani Manikandan <sup>1</sup>, Santhana Krishnan Harish <sup>1,2</sup>, Kuppusamy Silambarasan <sup>1</sup>, Shanmugam Gopalakrishnan <sup>1,3</sup>, Hiroya Ikeda <sup>2</sup>, Mani Navaneethan <sup>1,3,\*</sup> and Jayaram Archana <sup>1,\*</sup>

<sup>1</sup> Functional Materials and Energy Devices Laboratory, Department of Physics and Nanotechnology, SRM Institute of Science and Technology, Kattankulathur, Chennai 603 203, India

<sup>2</sup> Research Institute of Electronics, Shizuoka University, 3-5-1 Johoku, Naka-Ku, Hamamatsu 432-8011, Shizuoka, Japan

<sup>3</sup> Nanotechnology Research Center (NRC), SRM Institute of Science and Technology, Kattankulathur, Chennai 603 203, India

\* Correspondence: m.navaneethan@gmail.com (M.N.); jayaram.archana@gmail.com (J.A.)

**Citation:** Athithya, S.; Manikandan, V.S.; Harish, S.; Silambarasan, K.; Gopalakrishnan, S.; Ikeda, H.; Navaneethan, M.; Archana, J. Plasmon Effect of Ag Nanoparticles on TiO<sub>2</sub>/rGO Nanostructures for Enhanced Energy Harvesting and Environmental Remediation. *Nanomaterials* **2023**, *13*, 65. <https://doi.org/10.3390/nano13010065>

Academic Editor: Muralidharan Paramsothy

Received: 22 October 2022

Revised: 10 December 2022

Accepted: 11 December 2022

Published: 23 December 2022

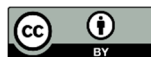

**Copyright:** © 2022 by the authors. Submitted for possible open access publication under the terms and conditions of the Creative Commons Attribution (CC BY) license (<https://creativecommons.org/licenses/by/4.0/>).

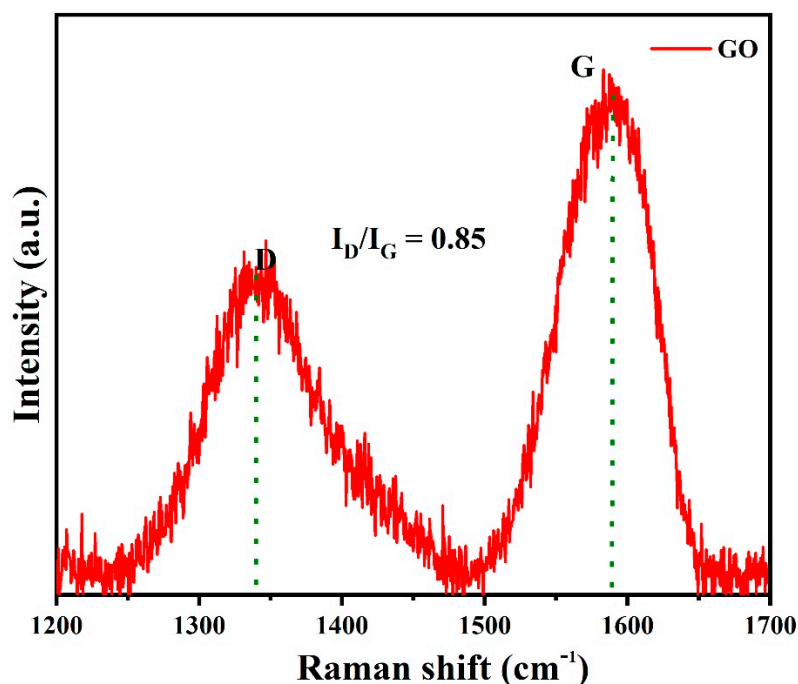

Figure S1. Raman spectra of prepared GO nanosheets.

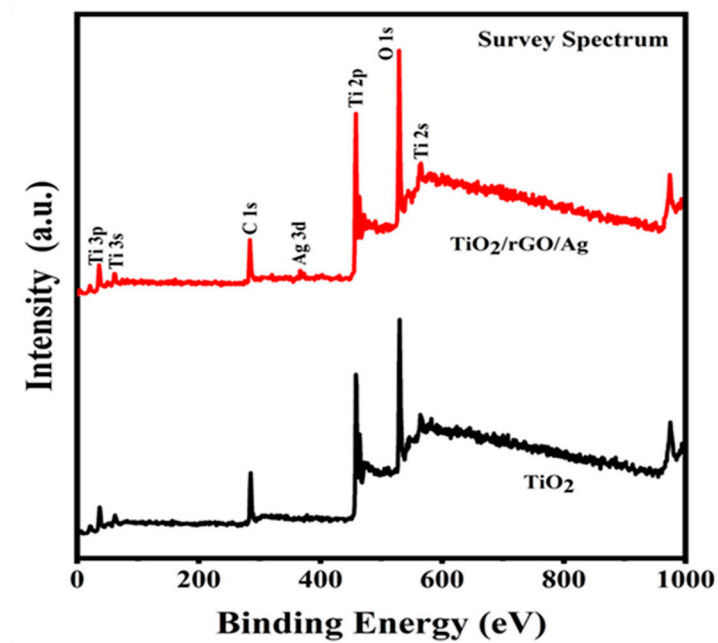

Figure S2. XPS survey spectrum of  $\text{TiO}_2$ ,  $\text{TiO}_2/\text{rGO}$  and  $\text{TiO}_2/\text{rGO}/\text{Ag}$ .

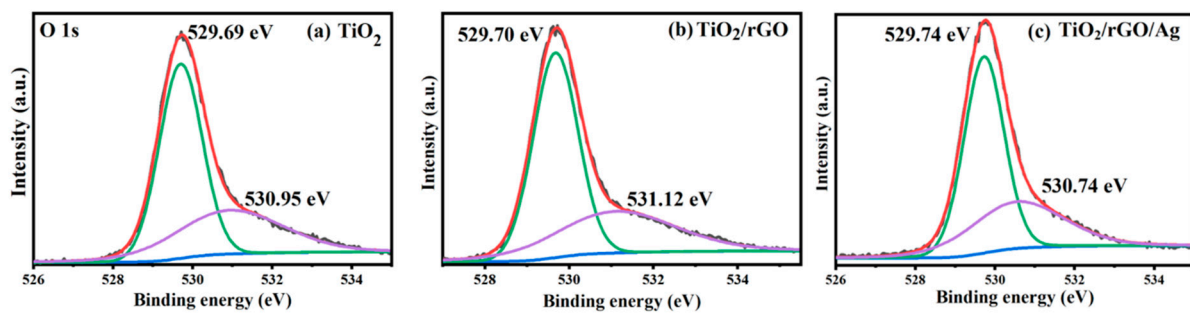

Figure S3. XPS O 1s spectra of (a)  $\text{TiO}_2$  (b)  $\text{TiO}_2/\text{rGO}$  and (c)  $\text{TiO}_2/\text{rGO}/\text{Ag}$  (green line (Ti-O-Ti bond) and violet line (Ti-O-C bond)).

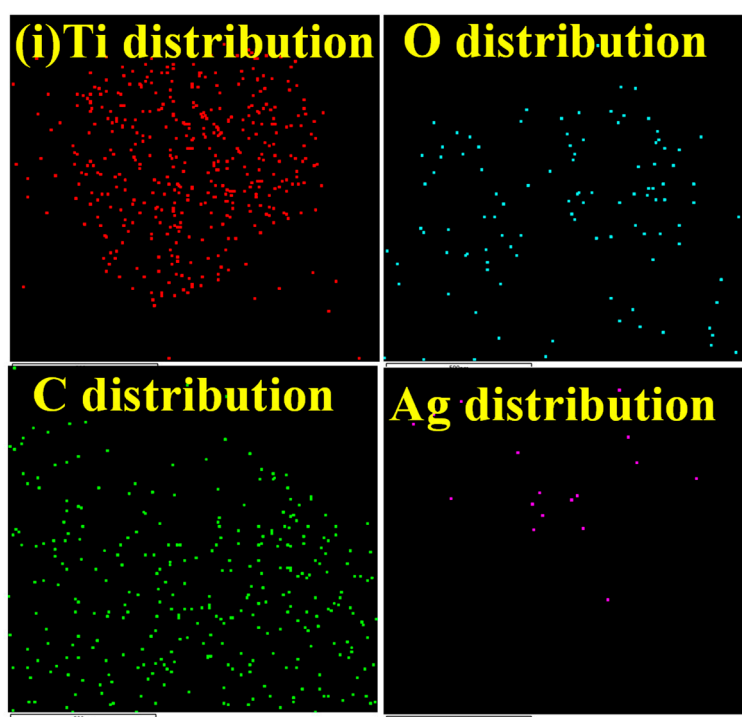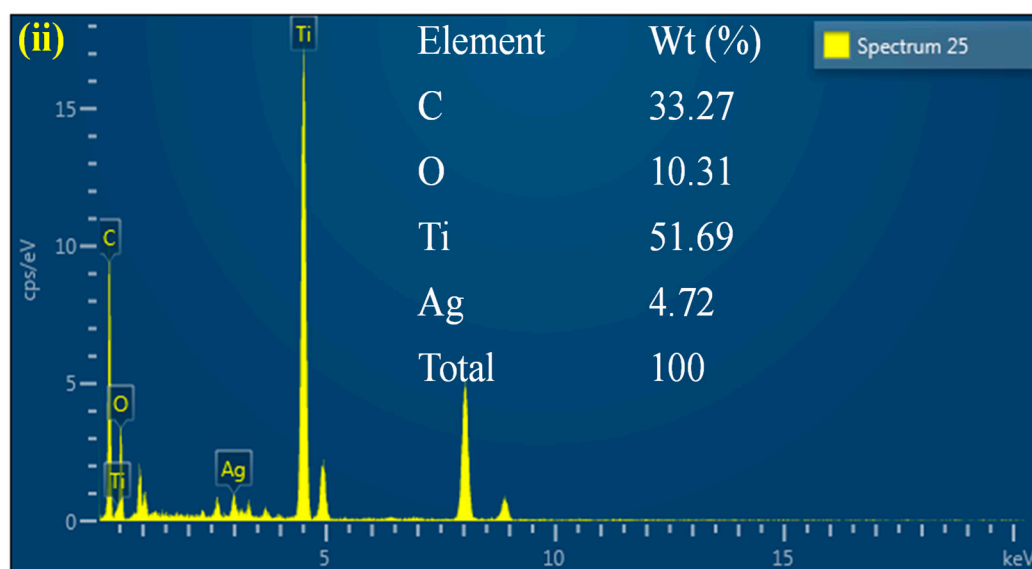

**Figure S4.** (i) STEM elemental mapping and (ii) EDX spectrum of TiO<sub>2</sub>/rGO/Ag hybrid ternary nanostructures.

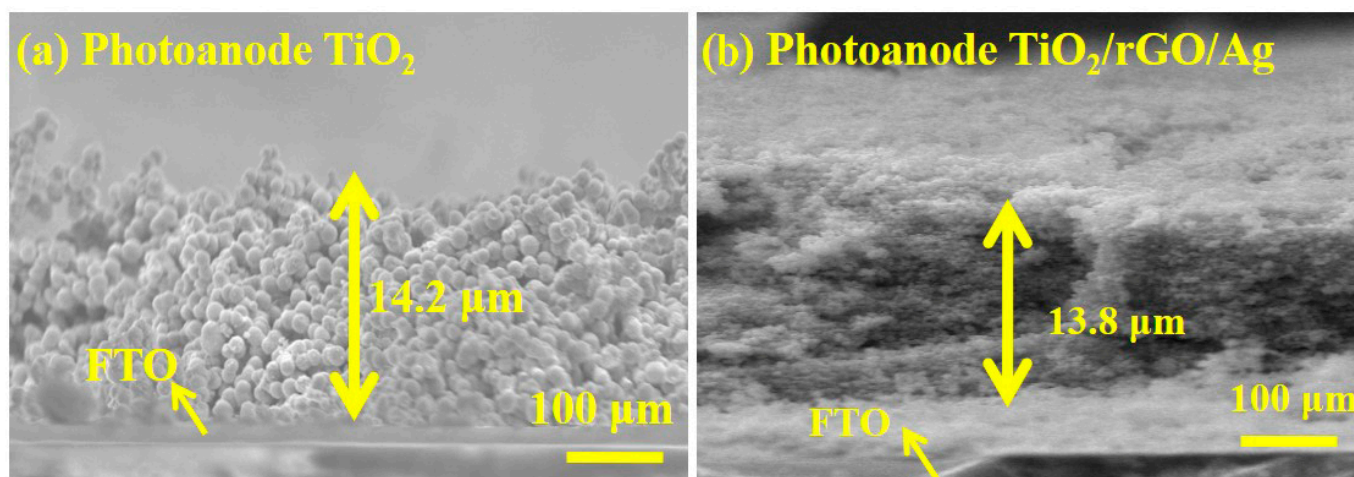

**Figure S5.** The HR-SEM cross section of (a)  $\text{TiO}_2$  (b)  $\text{TiO}_2/\text{rGO}/\text{Ag}$  photoanode.

The functional group of the synthesized samples were performed by FTIR spectrum as shown in Figure S6. The strong and broad peaks are observed in range of  $2800$  to  $3400\text{ cm}^{-1}$ , and it's attributed to the stretching vibration of the O-H bond (the hydroxyl groups in carboxylic acid). Besides, the other peak at  $1623\text{ cm}^{-1}$  represents the C=O group which direct confirms the presence of GO sheet. On other hand, the hydroxyl peak has observed at  $3430\text{ cm}^{-1}$  and  $1224\text{ cm}^{-1}$ , respectively [1]. Then, major peak intensity of GO is reduced significantly which reveals that removal of oxygen-containing groups namely reduced graphene oxide after the solvothermal treatment of  $\text{TiO}_2/\text{rGO}$ . Besides, the weak peak is observed at  $1224\text{ cm}^{-1}$  due to the epoxy C-O-C stretching vibration [2]. All the peaks in FTIR study are originated from the oxygenated functional group and C=C indicating the existence of rGO in the hybrid nanostructure.

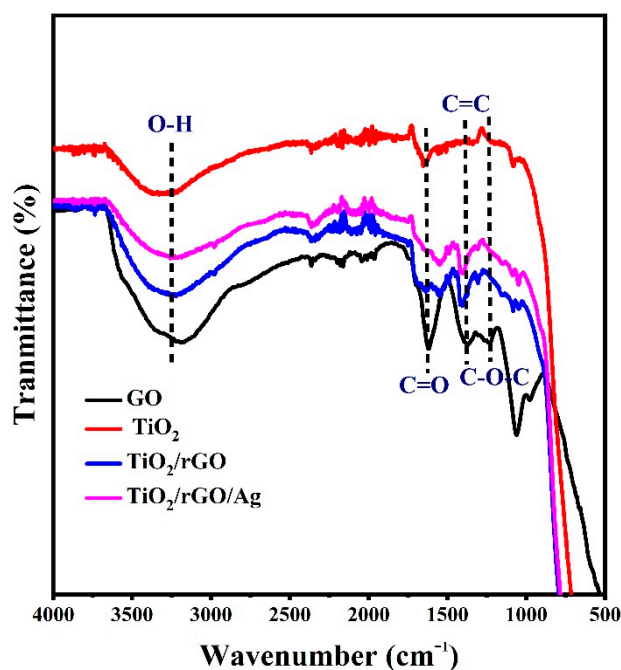

**Figure S6.** FTIR spectra of GO,  $\text{TiO}_2$ ,  $\text{TiO}_2/\text{rGO}$  and  $\text{TiO}_2/\text{rGO}/\text{Ag}$ .

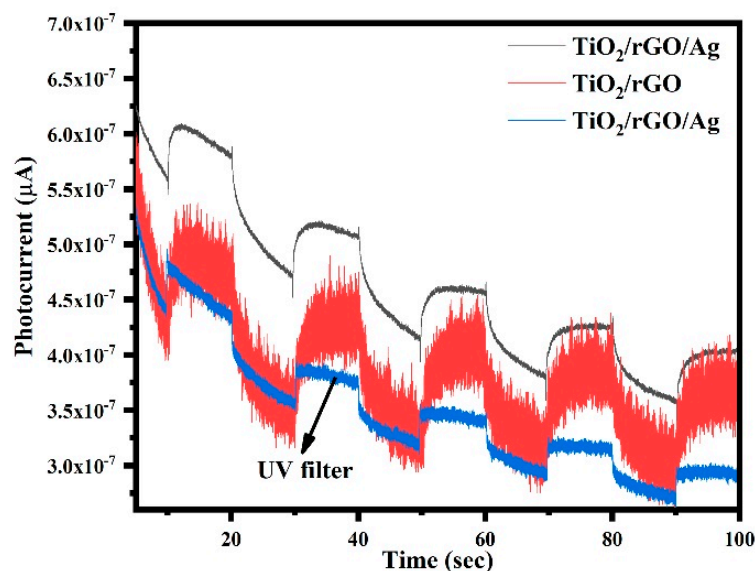

**Figure S7.** Transient photocurrent spectra of  $\text{TiO}_2/\text{rGO}$  and  $\text{TiO}_2/\text{rGO}/\text{Ag}$  (under with and without UV filter).

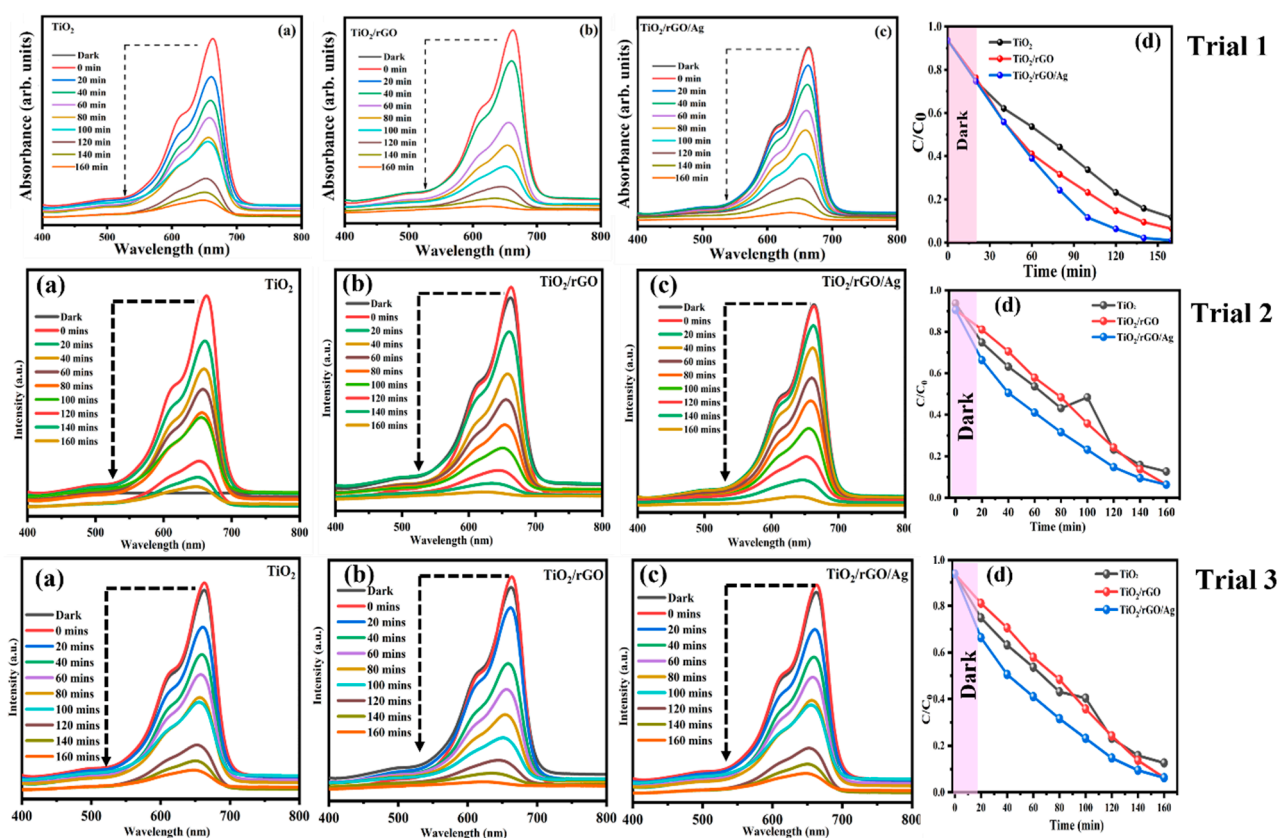

**Figure S8.** (a-c) Three different trials of UV absorption spectra of MB degradation with different interval time under natural sunlight. (d) Plots of  $\ln(C/C_0)$  as a function of time (min) towards the photo degradation of MB.

## References

1. Zhang, H.; Wang, X.; Li, N.; Xia, J.; Meng, Q.; Ding, J.; Lu, J. Synthesis and characterization of TiO<sub>2</sub>/graphene oxide nanocomposites for photoreduction of heavy metal ions in reverse osmosis concentrate. *RSC Adv.* **2018**, *8*, 34241–34251, <https://doi.org/10.1039/c8ra06681g>.
2. Qiu, B.; Zhou, Y.; Ma, Y.; Yang, X.; Sheng, W.; Xing, M.; Zhang, J. Facile synthesis of the Ti<sup>3+</sup> self-doped TiO<sub>2</sub>-graphene nanosheet composites with enhanced photocatalysis. *Sci. Rep.* **2015**, *5*, 8591–8591, <https://doi.org/10.1038/srep08591>.

**Disclaimer/Publisher's Note:** The statements, opinions and data contained in all publications are solely those of the individual author(s) and contributor(s) and not of MDPI and/or the editor(s). MDPI and/or the editor(s) disclaim responsibility for any injury to people or property resulting from any ideas, methods, instructions or products referred to in the content.
